# Supplementary material
Source: ML conference proceedings conference paper supplement (https://openaccess.thecvf.com/content/ACCV2024/html/Yamashita_Image_Deraining_with_ACCV_2024_paper.html)
Supplement: Supplementary file 1 [file Yamashita_Image_Deraining_with_ACCV_2024_supplemental.pdf]

# Supplementary Material: Image Deraining with Frequency-Enhanced State Space Model

Shugo Yamashita\*<sup>✉</sup> and Masaaki Ikehara <sup>✉</sup>

Keio University, Yokohama, Japan  
 {yamashita,ikehara}@tkhm.elec.keio.ac.jp

## 1 Detailed Description of 2D-SSM

Our proposed DFSSM employs the 2D Selective Scan Module (2D-SSM) [2, 3]. This section describes the 2D-SSM as illustrated in Fig. 1. The input two-dimensional features are traversed along four different scanning paths. These sequences are fed into selective State Space Mode (S6) [1] blocks individually. The outputs of S6 blocks are scanned in their original order and converted to two-dimensional features. The sum of the four results constitutes the final output features.

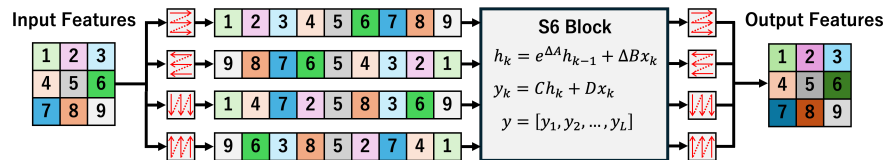

Fig. 1: Illustration of 2D Selective Scan Module (2D-SSM) [2, 3].

## References

1. Gu, A., Dao, T.: Mamba: Linear-time sequence modeling with selective state spaces. arXiv preprint arXiv:2312.00752 (2023)
2. Guo, H., Li, J., Dai, T., Ouyang, Z., Ren, X., Xia, S.T.: Mambair: A simple baseline for image restoration with state-space model. arXiv preprint arXiv:2402.15648 (2024)
3. Liu, Y., Tian, Y., Zhao, Y., Yu, H., Xie, L., Wang, Y., Ye, Q., Liu, Y.: Vmamba: Visual state space model. arXiv preprint arXiv:2401.10166 (2024)

\* Corresponding author
